# Supplementary material for: Remarkable synergy between sawdust biochar and attapulgite/diatomite after co-ball milling to adsorb methylene blue
Source: Royal Society of Chemistry journal article supplement (doi:10.1039/d3ra01123b), 2023-01-01
Supplement: d3ra01123b1.pdf [file d3ra01123b1.pdf]

## Supporting Information

### Remarkable synergy between sawdust biochar and attapulgite/diatomite after co-ball milling to adsorb methylene blue

Fei Jiang<sup>1</sup>, Feiyue Li<sup>1#\*</sup>, Andrew R. Zimmerman<sup>2</sup>, Zhongpu Yu<sup>1</sup>, Licheng Ji<sup>1</sup>, Chengcheng Wei<sup>1</sup>, Xueyang Zhang<sup>4</sup>, Bin Gao<sup>3</sup>

1. College of Resources and Environment Science, Anhui Science and Technology University, Fengyang, 233100, China

2. Department of Geological Sciences, University of Florida, Gainesville, FL 32611, USA

3. Department of Agricultural and Biological Engineering, University of Florida, Gainesville, FL 32611, USA

4. School of Environmental Engineering, Jiangsu Key Laboratory of Industrial Pollution Control and Resource Reuse, Xuzhou University of Technology, Xuzhou 221018, PR China

# Equal contribution to the paper

\*Corresponding author

E-mail: [lify@ahstu.edu.cn](mailto:lify@ahstu.edu.cn)

### 1. Removal rate R (%) and adsorption capacity Q (mg·g<sup>-1</sup>):

$$R = \frac{C_0 - C}{C_0} \times 100\%$$

$$Q = \frac{(C_0 - C) \times V}{M}$$

Notes:

C<sub>0</sub> is the initial MB concentration, mg·L<sup>-1</sup>;

C is the MB concentration after adsorption, mg·L<sup>-1</sup>;

V is the volume of solution containing MB, L;

M is the amount of adsorbent added, g.

### 2. Adsorption kinetic models

Adsorption kinetic data were fitted with pseudo-first-order and pseudo-second-order models to evaluate potential adsorption mechanisms.

Pseudo first-level model (Al-Ghouti et al., 2009):

$$Q_t = Q_e(1 - e^{-K_1 t})$$

Pseudo secondary model (Al-Ghouti et al., 2009):

$$Q_t = \frac{Q_e^2 K_2 t}{1 + Q_e K_2 t}$$

Notes:

Q<sub>e</sub> is the heavy metal adsorption capacity at equilibrium, mg·g<sup>-1</sup>;

Q<sub>t</sub> is the heavy metal adsorption capacity at time t, mg·g<sup>-1</sup>;

K<sub>1</sub> is the pseudo-first-order adsorption rate constant, L·min<sup>-1</sup>;

K<sub>2</sub> is the pseudo-second-order adsorption rate constant, g·(mg·min)<sup>-1</sup>.

### 3. Adsorption isotherm models

Adsorption isotherms were fitted with the Langmuir and Freundlich models, which can be described as the following equations, respectively (Tayibi et al., 2021):

$$Q_e = K_F C_e^{\frac{1}{n}}$$

$$Q_e = Q_m \frac{K_L C_e}{1 + K_L C_e}$$

Notes:

$C_e$  is the equilibrium concentration,  $\text{mg}\cdot\text{L}^{-1}$ ;

$Q_e$  is the equilibrium adsorption capacity,  $\text{mg}\cdot\text{g}^{-1}$ ;

$Q_m$  is the maximum theoretical adsorption capacity,  $\text{mg}\cdot\text{g}^{-1}$ ;

$K_L$  is the Langmuir equilibrium constant,  $\text{L}\cdot\text{mg}^{-1}$ ;

$K_F$  and  $n$  are the Freundlich equilibrium constants,  $(\text{mg}\cdot\text{g}^{-1}) (\text{L}\cdot\text{min}^{-1})^{1/n}$ .

**4. Table S1. Adsorption capacity and removal rate of MB by various adsorbents**

| Samples    | Adsorption capacity<br>( $\text{mg}\cdot\text{g}^{-1}$ ) | Removal rate<br>(%) |
|------------|----------------------------------------------------------|---------------------|
| MBC        | 69.49                                                    | 44.19               |
| BC         | 1.10                                                     | 0.46                |
| MATP       | 31.55                                                    | 21.72               |
| ATP        | 74.34                                                    | 47.47               |
| MDE        | 13.79                                                    | 13.34               |
| DE         | 0                                                        | 0.38                |
| MABC10%    | 158.10                                                   | 98.95               |
| MABC20%    | 156.59                                                   | 98.02               |
| MABC30%    | 150.18                                                   | 93.43               |
| MABC40%    | 141.33                                                   | 88.74               |
| MABC10%-CK | 85.14                                                    | 52.87               |
| MDBC10%    | 145.66                                                   | 91.02               |
| MDBC20%    | 145.78                                                   | 91.17               |
| MDBC30%    | 140.20                                                   | 87.74               |
| MDBC40%    | 143.19                                                   | 90.39               |
| MDBC10%-CK | 68.69                                                    | 42.17               |

**5. Table S2. Properties of selected ball milled adsorbents.**

| Samples | C<br>(%) | H<br>(%) | O<br>(%) | N<br>(%) | H/C  | O/C  | CEC<br>( $\text{cmol}^+\cdot\text{kg}^{-1}$ ) | Surface Area<br>( $\text{m}^2\cdot\text{g}^{-1}$ ) | Pore Volume<br>( $\text{cm}^3\cdot\text{g}^{-1}$ ) | Mean Pore Diameter<br>(nm) |
|---------|----------|----------|----------|----------|------|------|-----------------------------------------------|----------------------------------------------------|----------------------------------------------------|----------------------------|
| MBC     | 80.8     | 2.6      | 13.0     | 0.2      | 0.39 | 0.12 | 10.8                                          | 400                                                | 0.19                                               | 0.96                       |
| MABC10% | 70.6     | 2.6      | 17.3     | 0.2      | 0.45 | 0.18 | 82.9                                          | 313                                                | 0.16                                               | 0.99                       |
| MDBC10% | 70.7     | 2.4      | 14.3     | 0.1      | 0.41 | 0.15 | 25.3                                          | 330                                                | 0.16                                               | 0.97                       |

**6. Table S3. Fitting parameters of adsorption isotherms and adsorption kinetics of selected ball-milled adsorbents.**

| Samples | Langmuir                                   |                                            | Freundlich |        |                                                                       | Pseudo-first-order |                                            |                              | Pseudo-second-order |                                            |                                                              |       |
|---------|--------------------------------------------|--------------------------------------------|------------|--------|-----------------------------------------------------------------------|--------------------|--------------------------------------------|------------------------------|---------------------|--------------------------------------------|--------------------------------------------------------------|-------|
|         | $Q_m$<br>( $\text{mg}\cdot\text{g}^{-1}$ ) | $k_L$<br>( $\text{L}\cdot\text{mg}^{-1}$ ) | $R^2$      | $1/n$  | $k_F$<br>( $\text{mg}^{1-1/n}\cdot\text{L}^{1/n}\cdot\text{g}^{-1}$ ) | $R^2$              | $Q_e$<br>( $\text{mg}\cdot\text{g}^{-1}$ ) | $k_1$<br>( $\text{h}^{-1}$ ) | $R^2$               | $Q_e$<br>( $\text{mg}\cdot\text{g}^{-1}$ ) | $k_2$<br>( $\text{g}\cdot\text{mg}^{-1}\cdot\text{h}^{-1}$ ) | $R^2$ |
| MBC     | 68.2                                       | 5.93                                       | 0.998      | 0.043  | 57.4                                                                  | 0.969              | 64.5                                       | 0.247                        | 0.319               | 67.2                                       | 0.006                                                        | 0.725 |
| MABC10% | 183                                        | 22.7                                       | 0.842      | 0.0512 | 0.0512                                                                | 0.804              | 145                                        | 0.110                        | 0.795               | 154                                        | 0.001                                                        | 0.969 |
| MDBC10% | 155                                        | 1.19                                       | 0.993      | 0.0568 | 0.0568                                                                | 0.813              | 124                                        | 0.112                        | 0.635               | 133                                        | 0.001                                                        | 0.877 |

**7. Table S4. Figure 1 and Figure 6 Analysis Data Sharing.**

| Samples    | Absorbance (a) | $Q_e$ (a) | Absorbance (b) | $Q_e$ (b) | Mean standard deviation |
|------------|----------------|-----------|----------------|-----------|-------------------------|
| MBC        | 21.80          | 71.92     | 22.40          | 69.49     | 1.71                    |
| BC         | 43.50          | 0.37      | 43.30          | 1.10      | 0.52                    |
| MATP       | 32.30          | 37.97     | 34.00          | 31.55     | 4.54                    |
| ATP        | 20.40          | 77.58     | 21.20          | 74.34     | 2.29                    |
| MDE        | 34.70          | 28.90     | 38.70          | 13.79     | 10.68                   |
| DE         | 39.30          | 1.21      | 39.60          | 0         | 0.85                    |
| MABC10%    | 0.36           | 158.55    | 0.47           | 158.10    | 0.31                    |
| MABC20%    | 0.72           | 157.07    | 0.84           | 156.59    | 0.34                    |
| MABC30%    | 2.77           | 148.81    | 2.43           | 150.18    | 0.97                    |
| MABC40%    | 4.30           | 142.63    | 4.62           | 141.33    | 0.91                    |
| MABC10%-CK | 20.7           | 84.04     | 20.40          | 85.13     | 0.77                    |
| MDBC10%    | 3.56           | 145.62    | 3.55           | 145.66    | 0.03                    |
| MDBC20%    | 3.47           | 145.98    | 3.52           | 145.78    | 0.14                    |
| MDBC30%    | 4.81           | 140.57    | 4.90           | 140.20    | 0.25                    |
| MDBC40%    | 3.45           | 146.06    | 4.16           | 143.19    | 2.03                    |
| MDBC10%-CK | 23.20          | 66.26     | 22.60          | 68.69     | 1.71                    |

| Samples |    | Absorbance (a) | Qe (a) | Absorbance (b) | Qe (b) | Mean standard deviation |
|---------|----|----------------|--------|----------------|--------|-------------------------|
| MBC     | 2  | 27.30          | 50.11  | 27.25          | 50.31  | 0.18                    |
|         | 3  | 26.70          | 53.20  | 26.95          | 52.2   | 0.88                    |
|         | 5  | 23.55          | 66.62  | 22.70          | 69.98  | 2.97                    |
|         | 7  | 21.20          | 73.24  | 20.50          | 76.11  | 2.53                    |
|         | 9  | 17.40          | 89.96  | 16.70          | 92.77  | 2.49                    |
|         | 10 | 15.40          | 93.04  | 15.25          | 93.69  | 0.57                    |
| MABC10% | 2  | 14.57          | 101.33 | 13.57          | 105.35 | 3.55                    |
|         | 3  | 10.55          | 117.80 | 10.62          | 117.5  | 0.26                    |
|         | 5  | 2.20           | 151.25 | 2.50           | 150.06 | 1.05                    |
|         | 7  | 2.06           | 151.57 | 2.52           | 149.68 | 1.66                    |
|         | 9  | 1.07           | 155.69 | 0.74           | 157.00 | 1.15                    |
|         | 10 | 1.12           | 155.10 | 2.36           | 149.71 | 4.76                    |
| MDBC10% | 2  | 8.65           | 125.18 | 8.70           | 124.98 | 0.17                    |
|         | 3  | 8.35           | 126.60 | 8.62           | 125.5  | 0.97                    |
|         | 5  | 3.32           | 146.81 | 3.27           | 147.01 | 0.17                    |
|         | 7  | 2.05           | 151.61 | 2.14           | 151.24 | 0.32                    |
|         | 9  | 0.30           | 158.77 | 0.28           | 158.87 | 0.09                    |
|         | 10 | 0.16           | 159.26 | 0.15           | 159.34 | 0.06                    |

| Samples |       | Absorbance (a) | Qe (a) | Absorbance (b) | Qe (b) | Mean standard deviation |
|---------|-------|----------------|--------|----------------|--------|-------------------------|
| MBC     | 0     | 23.70          | 73.02  | 23.60          | 73.39  | 0.32                    |
|         | 0.001 | 22.20          | 69.38  | 21.80          | 71.02  | 1.44                    |
|         | 0.01  | 21.15          | 74.97  | 21.35          | 74.17  | 0.71                    |
|         | 0.1   | 18.30          | 85.77  | 16.35          | 93.68  | 6.99                    |
| MABC10% | 0     | 2.74           | 149.94 | 2.55           | 150.64 | 0.61                    |
|         | 0.001 | 2.37           | 150.30 | 2.12           | 151.32 | 0.90                    |
|         | 0.01  | 1.22           | 155.09 | 1.42           | 154.29 | 0.71                    |
|         | 0.1   | 1.09           | 155.55 | 0.87           | 156.45 | 0.78                    |
| MDBC10% | 0     | 6.77           | 135.13 | 6.82           | 134.95 | 0.16                    |
|         | 0.001 | 11.17          | 114.38 | 11.10          | 114.69 | 0.27                    |
|         | 0.01  | 9.82           | 120.50 | 10.90          | 116.18 | 3.82                    |
|         | 0.1   | 4.65           | 141.14 | 4.92           | 140.02 | 0.98                    |

## References

- Al-Ghouti, M.A., Khraisheh, M.A., Ahmad, M.N., Allen, S. 2009. Adsorption behaviour of methylene blue onto Jordanian diatomite: a kinetic study. *J Hazard Mater*, **165**(1-3), 589-98.
- Tayibi, S., Monlau, F., Fayoud, N.E., Abdeljaoued, E., Hannache, H., Zeroual, Y., Oukarroum, A., Barakat, A. 2021. Production and Dry Mechanochemical Activation of Biochars Derived from Moroccan Red Macroalgae Residue and Olive Pomace Biomass for Treating Wastewater: Thermodynamic, Isotherm, and Kinetic Studies. *ACS Omega*, **6**(1), 159-171.
